# Supplementary material for: Impact of Climate Warming on Oncomelania hupensis in China- Multi-scale Evidence
Source: Research Square preprint supplement (doi:10.21203/rs.3.rs-8804450/v1), 2026-02-17
Supplement: Supplementary file 2 [file 07844b8c48761e6571c8b1fc.docx]

**Table A1. Results from the Cox regression without temperature* body size interactions**

|  | Coef | *z* | *p* |
| --- | --- | --- | --- |
| High Temp vs Control | 1.9274 | 7.286 | 3.2e-13*** |
| Low Temp vs Control | 0.6933 | 2.310 | 0.0209*** |
| Likelihood radio test: 84.59 | | *p*<2.2e-16 | |

**Table A2. Results from Cox regression with temperature* body size interactions**

|  | **Coef** | ***z*** | ***p*** |
| --- | --- | --- | --- |
| Treatment: High Temp | 1.67151 | 7.096 | 1.28e-12*** |
| Treatment: Low Temp | -0.40282 | -4.256 | 0.000021*** |
| Body size (before experiment) | -0.35547 | -9.938 | 4.27e-12* |
| Treatment: High Temp: Body size (before experiment) | -0.23468 | -2.140 | 0.033* |
| Treatment: Low Temp: Body size (before experiment) | 0.06908 | 3.138 | 0.0016** |
