# Supplementary material for: Impact of Climate Warming on Oncomelania hupensis in China- Multi-scale Evidence
Source: Research Square preprint supplement (doi:10.21203/rs.3.rs-8804450/v1), 2026-02-17
Supplement: Supplementary file 4 [file 1af399fc5ad52ca905e1a6b7.docx]

**Table A1. Comparison of Body sizes before and after the experiment**

| **Treatment** | **Before (95% *CI*)** | **After (95% *CI*)** | ***p*** |
| --- | --- | --- | --- |
| High temp | 7.1  (6.2, 8) | 8  (7.75, 8.25) | 0.0179 * |
| Control | 7.2  (6.3, 8.1) | 7.9  (7.7, 8.1) | 0.468 |
| Low temp | 7.1  (6.2, 8) | 8.2  (7.78, 8.62) | 0.00914* |

**Table A2 Comparison of Body weights before and after the experiment**

| **Treatment** | **Before weight (95% *CI*)** | **After weight (95% *CI*)** | ***p*** |
| --- | --- | --- | --- |
| High temp | 33  (27.2, 38.8) | 25.5  (21.2, 29.8) | 0.0252* |
| Control | 28  (20.5, 35.5) | 31  (24, 38) | 0.477 |
| Low temp | 34  (29, 39) | 26.5  (22, 31) | 0.0323* |
