# Supplementary material for: Impact of Climate Warming on Oncomelania hupensis in China- Multi-scale Evidence
Source: Research Square preprint supplement (doi:10.21203/rs.3.rs-8804450/v1), 2026-02-17
Supplement: Supplementary file 12 [file 93a58105a5d6d3ecc2e3d279.docx]

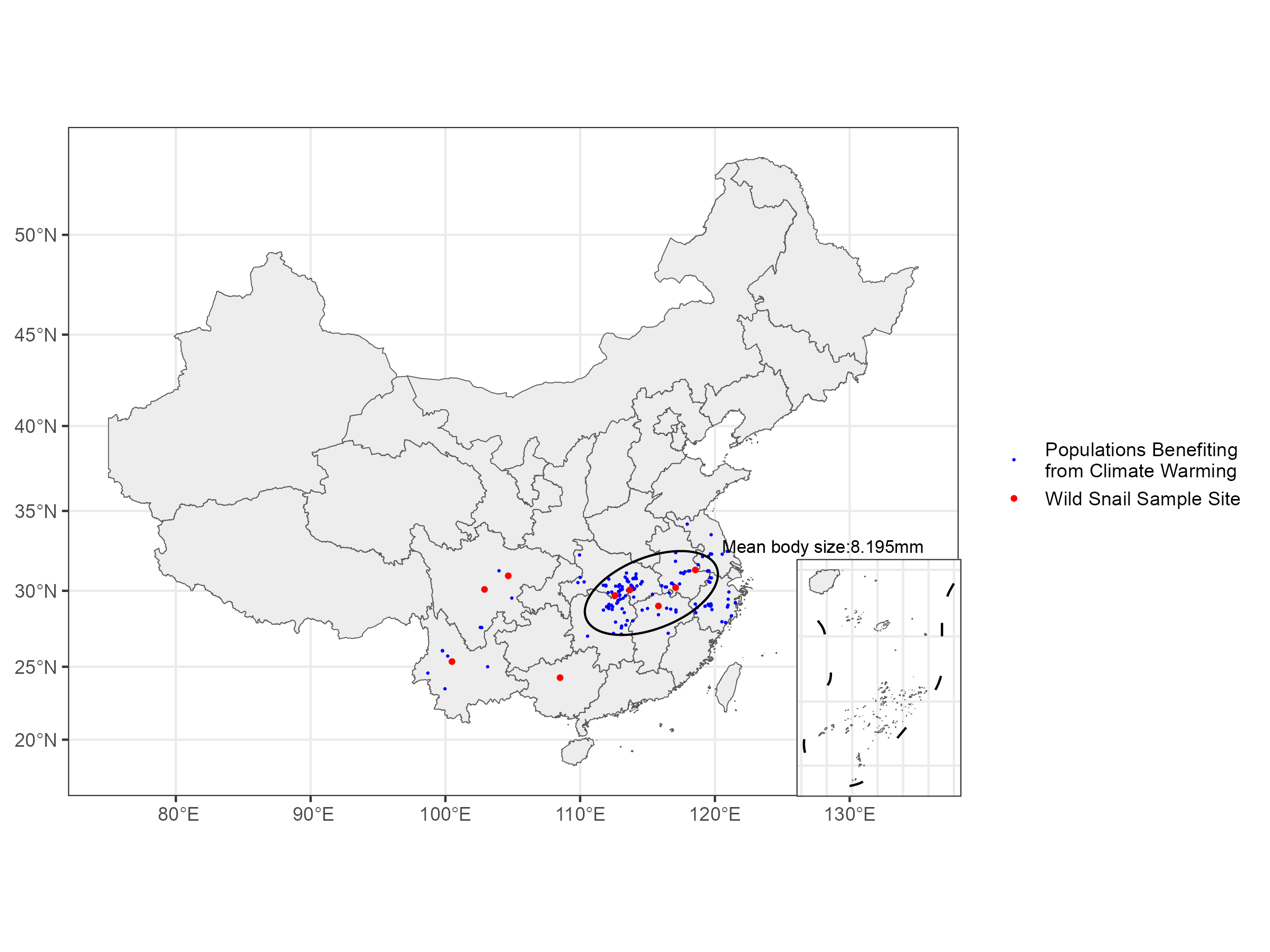


**Figure A1: Spatial distribution of populations benefiting from climate warming and wild snail sampling sites**
