# Supplementary material for: Impact of Climate Warming on Oncomelania hupensis in China- Multi-scale Evidence
Source: Research Square preprint supplement (doi:10.21203/rs.3.rs-8804450/v1), 2026-02-17
Supplement: Supplementary file 14 [file aba5b1ebe148ff8583875e41.docx]

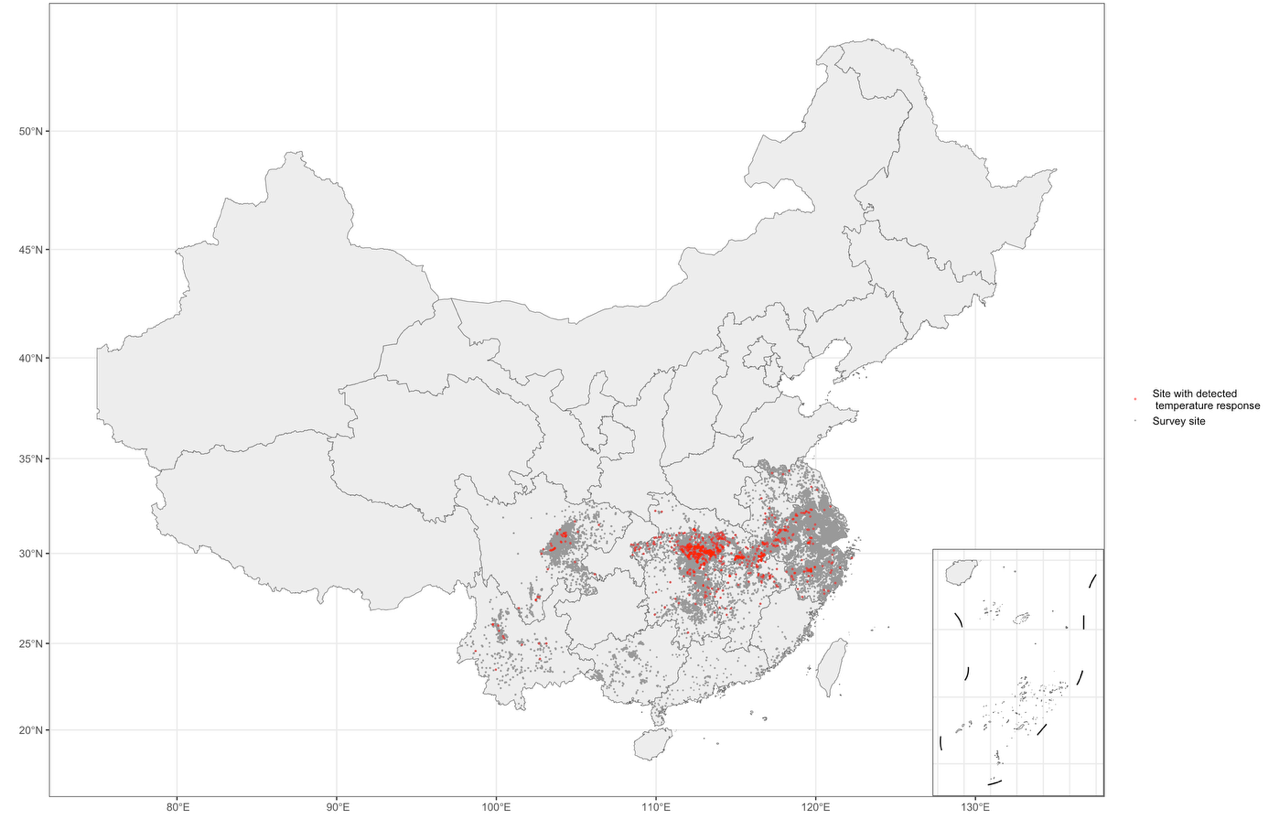


**Figure A1: Plot of the distribution survey site and the sample sites of *Oncomelania hupensis***

The grey points represent sites for sliding window models; the red points represent sampling sites with detected temperature responses
